# Supplementary material for: Synergies and Trade-offs in the Sustainable Development Goals &ndash; the Implications of the Icelandic Tourism Sector
Source: Preprints.org preprint supplement (doi:10.20944/preprints201907.0014.v1), 2019-07-01
Supplement: Supplementary file 2 [file supplementary]

**Table A3.** Evaluative matrix of synergies and trade-offs between Icelandic tourism and SDG targets

|        | SUSTAINABLE DEVELOPMENT GOAL |       |       |      |       |       |       |      |      |      |       |       |      |       |       |       |      |      |  |  |  |  |  |  |  |  |  |
|--------|------------------------------|-------|-------|------|-------|-------|-------|------|------|------|-------|-------|------|-------|-------|-------|------|------|--|--|--|--|--|--|--|--|--|
| TARGET | 1                            | 2     | 3     | 4    | 5     | 6     | 7     | 8    | 9    | 10   | 11    | 12    | 13   | 14    | 15    | 16    | 17   |      |  |  |  |  |  |  |  |  |  |
| 1      | -0.20                        | 0.00  | 0.00  | 0.00 | -0.40 | 0.00  | -1.25 | 1.75 | 2.00 | 0.25 | -1.00 | 1.25  | 0.80 | -2.20 | -0.20 | -0.80 | 1.00 |      |  |  |  |  |  |  |  |  |  |
| 2      | 0.60                         | -0.60 | 0.00  | 0.00 | -2.40 | 0.80  | -1.00 | 0.00 | 0.00 | 0.50 | 0.00  | 1.75  | 1.00 | -1.80 | 0.00  | -0.40 | 0.00 |      |  |  |  |  |  |  |  |  |  |
| 3      | 0.00                         | 1.00  | -0.20 | 1.40 | 0.00  | -1.80 | 0.25  | 2.25 | 1.25 | 0.50 | 0.00  | 0.75  | 1.20 | -1.20 | -0.60 | 0.80  | 0.00 |      |  |  |  |  |  |  |  |  |  |
| 4      | 0.00                         | 0.40  | 0.00  | 1.80 | -0.20 | 0.00  |       | 1.25 | 1.25 | 0.50 | 2.00  | -0.75 |      | 0.00  | -0.80 | -0.40 | 0.00 |      |  |  |  |  |  |  |  |  |  |
| 5      | -0.60                        | 0.20  | -0.40 | 0.00 | 1.00  | 0.00  |       | 1.25 | 0.50 | 0.75 | 0.00  | 0.75  |      | -0.20 | -1.20 | -1.20 | 0.00 |      |  |  |  |  |  |  |  |  |  |
| 6      |                              |       | 0.20  | 0.00 | 0.00  | 0.00  |       | 2.50 |      | 0.00 | -0.80 | 0.25  |      | 0.00  | 0.00  | 0.00  | 0.00 |      |  |  |  |  |  |  |  |  |  |
| 7      |                              |       | -0.20 | 1.00 |       |       |       | 0.00 |      | 0.75 | 0.00  | 0.25  |      | 0.00  | 0.00  | 0.00  | 0.00 |      |  |  |  |  |  |  |  |  |  |
| 8      |                              |       | 0.00  |      |       |       |       | 0.25 |      |      |       | 2.00  |      |       |       | -2.20 | 0.00 | 0.00 |  |  |  |  |  |  |  |  |  |
| 9      |                              |       | -0.40 |      |       |       |       | 1.75 |      |      |       | 0.00  |      |       |       | 0.00  | 0.00 |      |  |  |  |  |  |  |  |  |  |
| 10     |                              |       |       |      |       |       |       | 1.25 |      |      |       | 0.00  |      |       |       | 0.00  |      |      |  |  |  |  |  |  |  |  |  |
| 11     |                              |       |       |      |       |       |       |      |      |      |       |       |      |       |       | 0.00  |      |      |  |  |  |  |  |  |  |  |  |
| 12     |                              |       |       |      |       |       |       |      |      |      |       |       |      |       |       |       |      |      |  |  |  |  |  |  |  |  |  |
| 13     |                              |       |       |      |       |       |       |      |      |      |       |       |      |       |       |       |      |      |  |  |  |  |  |  |  |  |  |
| 14     |                              |       | 2.00  |      |       |       |       |      |      |      |       |       |      |       |       |       |      |      |  |  |  |  |  |  |  |  |  |
| 15     | 0.00                         |       |       |      |       |       |       |      |      |      |       |       |      |       |       |       |      |      |  |  |  |  |  |  |  |  |  |
| 16     | 1.00                         |       |       |      |       |       |       |      |      |      |       |       |      |       |       |       |      |      |  |  |  |  |  |  |  |  |  |
| 17     | 1.60                         |       |       |      |       |       |       |      |      |      |       |       |      |       |       |       |      |      |  |  |  |  |  |  |  |  |  |
| 18     | 0.00                         |       |       |      |       |       |       |      |      |      |       |       |      |       |       |       |      |      |  |  |  |  |  |  |  |  |  |
| 19     | 0.00                         |       |       |      |       |       |       |      |      |      |       |       |      |       |       |       |      |      |  |  |  |  |  |  |  |  |  |
| A      | -0.80                        | -0.60 | 0.00  | 0.00 | 0.20  | 0.60  | 1.25  | 0.25 | 0.25 | 0.00 | 1.40  | 0.50  | 0.00 | 0.40  | -0.20 | 0.00  |      |      |  |  |  |  |  |  |  |  |  |
| B      | -0.20                        | 0.00  | 0.00  | 0.00 | 0.00  | 1.40  | 1.00  | 0.00 | 1.00 | 0.00 | 1.40  | 0.75  | 0.00 | 0.00  | 0.00  | 0.60  |      |      |  |  |  |  |  |  |  |  |  |
| C      |                              | 0.00  | 0.00  | 0.00 | 0.20  |       |       |      |      | 0.50 | 0.00  | 0.00  | 0.25 |       | 0.00  | 0.00  |      |      |  |  |  |  |  |  |  |  |  |
| D      |                              |       | 0.20  |      |       |       |       |      |      |      |       |       |      |       |       |       |      |      |  |  |  |  |  |  |  |  |  |

Synergy ( $\geq 1$ )

Neither synergy nor trade-off ( $-1 > x > 1$ )

Trade-off ( $\leq -1$ )

Target does not exist
